# Supplementary material for: Mobile Health Interventions for Self-Control of Unhealthy Alcohol Use: Systematic Review
Source: PubMed Central journal article supplement (PMC6371076; doi:10.2196/10899), 2019-01-29
Supplement: mhealth_v7i1e10899_app1.pdf [file mhealth_v7i1e10899_app1.pdf]

## Appendix 1. Searching and screening records

### Database

Scopus, MEDLINE with Full Text, CINAHL Plus with Full Text, PsycINFO, PsycARTICLES, PubMed, PMC

### Track

#### Step 1

Scopus

|               | Searching terms and combinations                                                                                                                                                                                        | Searching field           | Limit                                                       |
|---------------|-------------------------------------------------------------------------------------------------------------------------------------------------------------------------------------------------------------------------|---------------------------|-------------------------------------------------------------|
|               | alcohol OR alcohol*                                                                                                                                                                                                     | Title, abstract, keywords | Date range (inclusive):                                     |
| AND           | mHealth OR m-Health OR "mobile health" OR "text messag*" OR "short message servic*" OR SMS OR "mobile phone" OR ((mobile OR smartphone OR cellphone) AND (app OR app* OR tech*)) OR "interactive voice response" OR IVR | Title, abstract, keywords | 2008 to 2017<br>Document type: article<br>Language: English |
| AND           | Interventio* OR (treatment AND program*) OR self-* OR "self control" OR "self regulation"                                                                                                                               | Title, abstract, keywords |                                                             |
| <b>Result</b> |                                                                                                                                                                                                                         |                           | <b>360</b>                                                  |

MEDLINE with Full Text, CINAHL Plus with Full Text, PsycINFO & PsycARTICLES

|               | Searching terms and combinations                                                                                                                                                                                        | Searching field | Limit                                                                                |
|---------------|-------------------------------------------------------------------------------------------------------------------------------------------------------------------------------------------------------------------------|-----------------|--------------------------------------------------------------------------------------|
|               | alcohol OR alcohol*                                                                                                                                                                                                     | Abstract        | Date of publication:                                                                 |
| AND           | mHealth OR m-Health OR "mobile health" OR "text messag*" OR "short message servic*" OR SMS OR "mobile phone" OR ((mobile OR smartphone OR cellphone) AND (app OR app* OR tech*)) OR "interactive voice response" OR IVR | Abstract        | January 2008 to December 2017<br>Source type: academic journals<br>Language: English |
| AND           | Interventio* OR (treatment AND program*) OR self-* OR "self control" OR "self regulation"                                                                                                                               | Abstract        |                                                                                      |
| <b>Result</b> |                                                                                                                                                                                                                         |                 | <b>628 (Medline 286, PsycINFO 182, CINAHL 146, PsycARTICLES 14)</b>                  |

Pubmed

| Search code               | Query                                                                                                                                                                                                                                                                                                                                                                                                                                                                                                                                                                                                                                                                                                                                                                                                                                                                                                                                                                                                                                                                                                                                                                                                              | Results |
|---------------------------|--------------------------------------------------------------------------------------------------------------------------------------------------------------------------------------------------------------------------------------------------------------------------------------------------------------------------------------------------------------------------------------------------------------------------------------------------------------------------------------------------------------------------------------------------------------------------------------------------------------------------------------------------------------------------------------------------------------------------------------------------------------------------------------------------------------------------------------------------------------------------------------------------------------------------------------------------------------------------------------------------------------------------------------------------------------------------------------------------------------------------------------------------------------------------------------------------------------------|---------|
| #1                        | Search (alcohol[Title/Abstract] OR alcohol*[Title/Abstract])                                                                                                                                                                                                                                                                                                                                                                                                                                                                                                                                                                                                                                                                                                                                                                                                                                                                                                                                                                                                                                                                                                                                                       | 304392  |
| #2                        | Search (mHealth[Title/Abstract] OR m-Health[Title/Abstract] OR "mobile health"[Title/Abstract] OR "text messag*" [Title/Abstract] OR "short message servic*" [Title/Abstract] OR SMS [Title/Abstract] OR "mobile phone"[Title/Abstract] OR ((mobile[Title/Abstract] OR smartphone[Title/Abstract] OR cellphone)[Title/Abstract] AND (app[Title/Abstract] OR apps[Title/Abstract] OR applicatio*[Title/Abstract] OR technology[Title/Abstract] OR technologies))[Title/Abstract] OR "interactive voice response" [Title/Abstract] OR IVR[Title/Abstract])                                                                                                                                                                                                                                                                                                                                                                                                                                                                                                                                                                                                                                                           | 1669    |
| #3                        | Search (Intervention[Title/Abstract] OR interventions[Title/Abstract] OR (treatment[Title/Abstract] AND program*[Title/Abstract] OR self-control[Title/Abstract] OR self-regulation[Title/Abstract] OR self-manag*[Title/Abstract] OR self-efficacy[Title/Abstract] OR self-help[Title/Abstract] OR self-monitor[Title/Abstract] OR self-report[Title/Abstract] OR "self control" [Title/Abstract] OR "self regulation"[Title/Abstract])                                                                                                                                                                                                                                                                                                                                                                                                                                                                                                                                                                                                                                                                                                                                                                           | 97883   |
| #4                        | Search (("journal article"[Publication Type]) AND ("2008/01/01"[Date - Publication] : "2017/12/31"[Date - Publication])) AND "english"[Language]                                                                                                                                                                                                                                                                                                                                                                                                                                                                                                                                                                                                                                                                                                                                                                                                                                                                                                                                                                                                                                                                   | 8487865 |
| 1 and 2<br>and 3<br>and 4 | Search (((("journal article"[Publication Type]) AND ("2008/01/01"[Date - Publication] : "2017/12/31"[Date - Publication])) AND "english"[Language])) AND ((Intervention[Title/Abstract] OR interventions[Title/Abstract] OR (treatment[Title/Abstract] AND program*[Title/Abstract] OR self-control[Title/Abstract] OR self-regulation[Title/Abstract] OR self-manag*[Title/Abstract] OR self-efficacy[Title/Abstract] OR self-help[Title/Abstract] OR self-monitor[Title/Abstract] OR self-report[Title/Abstract] OR "self control" [Title/Abstract] OR "self regulation"[Title/Abstract]))) AND ((mHealth[Title/Abstract] OR m-Health[Title/Abstract] OR "mobile health"[Title/Abstract] OR "text messag*" [Title/Abstract] OR "short message servic*" [Title/Abstract] OR SMS [Title/Abstract] OR "mobile phone"[Title/Abstract] OR ((mobile[Title/Abstract] OR smartphone[Title/Abstract] OR cellphone)[Title/Abstract] AND (app[Title/Abstract] OR apps[Title/Abstract] OR applicatio*[Title/Abstract] OR technology[Title/Abstract] OR technologies))[Title/Abstract] OR "interactive voice response" [Title/Abstract] OR IVR[Title/Abstract]))) AND ((alcohol[Title/Abstract] OR alcohol*[Title/Abstract])) | 278     |

| Search code         | Query                                                                                                                                                                                                                                                                                                                                                                                                                                                                                                                                                                                                                                                                                                                                                                                                                                                                                                                                                                 | Results |
|---------------------|-----------------------------------------------------------------------------------------------------------------------------------------------------------------------------------------------------------------------------------------------------------------------------------------------------------------------------------------------------------------------------------------------------------------------------------------------------------------------------------------------------------------------------------------------------------------------------------------------------------------------------------------------------------------------------------------------------------------------------------------------------------------------------------------------------------------------------------------------------------------------------------------------------------------------------------------------------------------------|---------|
| #1                  | Search alcohol[Abstract]                                                                                                                                                                                                                                                                                                                                                                                                                                                                                                                                                                                                                                                                                                                                                                                                                                                                                                                                              | 44193   |
| #2                  | Search (mHealth[Abstract] OR m-Health[Abstract] OR "mobile health"[Abstract] OR "text message"[Abstract] OR "text messaging"[Abstract] OR "short message servic*"[Abstract] OR SMS [Abstract] OR "mobile phone"[Abstract] OR ((mobile[Abstract] OR smartphone[Abstract] OR cellphone)[Abstract] AND (app[Abstract] OR apps[Abstract] OR applicatio*[Abstract] OR technology[Abstract] OR technologies))[Abstract] OR "interactive voice response" [Abstract] OR IVR[Abstract])                                                                                                                                                                                                                                                                                                                                                                                                                                                                                        | 6412    |
| #3                  | Search (Intervention[Abstract] OR interventions[Abstract] OR (treatment[Abstract] AND (program[Abstract] OR programme))[Abstract] OR self-control[Abstract] OR self-regulation[Abstract] OR self-manag*[Abstract] OR self-efficacy[Abstract] OR self-help[Abstract] OR self-monitor[Abstract] OR self-report[Abstract] OR "self control" [Abstract] OR "self regulation"[Abstract])                                                                                                                                                                                                                                                                                                                                                                                                                                                                                                                                                                                   | 53881   |
| #4                  | Search ("2008/01/01"[Publication Date] : "2017/12/31"[Publication Date])                                                                                                                                                                                                                                                                                                                                                                                                                                                                                                                                                                                                                                                                                                                                                                                                                                                                                              | 2899881 |
| 1 and 2 and 3 and 4 | Search (((("2008/01/01"[Publication Date] : "2017/12/31"[Publication Date])) AND alcohol[Abstract]) AND ((mHealth[Abstract] OR m-Health[Abstract] OR "mobile health"[Abstract] OR "text message"[Abstract] OR "text messaging"[Abstract] OR "short message servic*"[Abstract] OR SMS [Abstract] OR "mobile phone"[Abstract] OR ((mobile[Abstract] OR smartphone[Abstract] OR cellphone)[Abstract] AND (app[Abstract] OR apps[Abstract] OR applicatio*[Abstract] OR technology[Abstract] OR technologies))[Abstract] OR "interactive voice response" [Abstract] OR IVR[Abstract]))) AND ((Intervention[Abstract] OR interventions[Abstract] OR (treatment[Abstract] AND (program[Abstract] OR programme))[Abstract] OR self-control[Abstract] OR self-regulation[Abstract] OR self-manag*[Abstract] OR self-efficacy[Abstract] OR self-help[Abstract] OR self-monitor[Abstract] OR self-report[Abstract] OR "self control" [Abstract] OR "self regulation"[Abstract])) | 32      |

Post-hoc searching from Journal of Medical Internet Research and its sister journals

|         |                                |              |
|---------|--------------------------------|--------------|
|         | alcohol OR alcohol*            | Abstract     |
| AND     | mobile OR SMS OR App OR IVR    | Abstract     |
| AND     | Intervention OR self OR self-* | Abstract     |
| AND     | From 2008.01.01 to 2017.12.31  | Publish date |
| Results |                                | 47           |

**Total publications retrieved: 360+628+278+32+47=1345**

## **Step 2.0**

Excluding duplicates = 828

Record number of papers = 517

## **Step 3.0**

Review titles and abstracts

Exclude papers = 476

Record number of papers = 41

## **Step 4.0**

Review whole papers

Exclude papers = 20

Record number of papers = 21

Record number of studies = 19
