# Supplementary material for: Mobile Health Interventions for Self-Control of Unhealthy Alcohol Use: Systematic Review
Source: PubMed Central journal article supplement (PMC6371076; doi:10.2196/10899), 2019-01-29
Supplement: mhealth_v7i1e10899_app2.pdf [file mhealth_v7i1e10899_app2.pdf]

## Appendix 2. Excluded papers with reasons

| Author (Year)           | Title                                                                                                                                                                                        | Reason for exclusion                                          | Defined criteria                                                                                                                                                                                                                                                                                                                                                                                                                                                                                                                                                                                                                                                                                                                                                                                         |
|-------------------------|----------------------------------------------------------------------------------------------------------------------------------------------------------------------------------------------|---------------------------------------------------------------|----------------------------------------------------------------------------------------------------------------------------------------------------------------------------------------------------------------------------------------------------------------------------------------------------------------------------------------------------------------------------------------------------------------------------------------------------------------------------------------------------------------------------------------------------------------------------------------------------------------------------------------------------------------------------------------------------------------------------------------------------------------------------------------------------------|
| You et al (2017)        | Smartphone-based support system (SoberDiary) coupled with a Bluetooth breathalyser for treatment-seeking alcohol-dependent patients                                                          | Not randomized controlled trials                              | <p><b>Inclusion criteria</b></p> <p>(1) the research focused on supporting consumer self-control of UAU;</p> <p>(2) the intervention was delivered through mobile technologies; and</p> <p>(3) the data were collected from empirical randomized controlled trials.</p> <p><b>Exclusion criteria</b></p> <p>(1) reported clinical therapy such as injection and medication rather than consumer active participation in the daily self-control of UAU;</p> <p>(2) did not report any alcohol-related outcome;</p> <p>(3) used the intervention not dealing with UAU or containing web-based components delivered by desktop/web-based computer applications; or</p> <p>(4) were review articles, study protocols, conceptual papers, editorials, government reports or guidelines in the topic area.</p> |
| Tahaney & Palfai (2017) | Text messaging as an adjunct to a web-based intervention for college student alcohol use: A preliminary study                                                                                | Contain web-based components                                  |                                                                                                                                                                                                                                                                                                                                                                                                                                                                                                                                                                                                                                                                                                                                                                                                          |
| Pedersen et al (2017)   | A randomized controlled trial of a web-based, personalized normative feedback alcohol intervention for young-adult veterans                                                                  | Contain web-based components                                  |                                                                                                                                                                                                                                                                                                                                                                                                                                                                                                                                                                                                                                                                                                                                                                                                          |
| Paz Castro et al (2017) | Moderators of outcome in a technology-based intervention to prevent and reduce problem drinking among adolescents                                                                            | Contain web-based components                                  |                                                                                                                                                                                                                                                                                                                                                                                                                                                                                                                                                                                                                                                                                                                                                                                                          |
| Haug et al (2017)       | Efficacy of a Web- and Text Messaging-Based Intervention to Reduce Problem Drinking in Adolescents: Results of a Cluster-Randomized Controlled Trial                                         | Contain web-based components                                  |                                                                                                                                                                                                                                                                                                                                                                                                                                                                                                                                                                                                                                                                                                                                                                                                          |
| Hamilton et al (2017)   | DIAMOND (DIgital Alcohol Management ON Demand): A mixed methods feasibility RCT and embedded process evaluation of a digital health intervention to reduce hazardous and harmful alcohol use | Feasibility study, did not report any alcohol-related outcome |                                                                                                                                                                                                                                                                                                                                                                                                                                                                                                                                                                                                                                                                                                                                                                                                          |
| Glass et al (2017)      | Treatment seeking as a mechanism of change in a randomized controlled trial of a mobile health intervention to support recovery from alcohol use disorders                                   | Secondary analysis rather than empirical study                |                                                                                                                                                                                                                                                                                                                                                                                                                                                                                                                                                                                                                                                                                                                                                                                                          |
| Davies et al (2017)     | Personalized digital interventions showed no impact on risky drinking in young adults: A pilot randomized controlled trial                                                                   | Contain web-based components                                  |                                                                                                                                                                                                                                                                                                                                                                                                                                                                                                                                                                                                                                                                                                                                                                                                          |
| Bertholet et al (2017)  | Smartphone application for unhealthy alcohol use: A pilot study                                                                                                                              | No control group                                              |                                                                                                                                                                                                                                                                                                                                                                                                                                                                                                                                                                                                                                                                                                                                                                                                          |

|                         |                                                                                                                                                                           |                                            |  |
|-------------------------|---------------------------------------------------------------------------------------------------------------------------------------------------------------------------|--------------------------------------------|--|
| Andersson et al (2017)  | Interactive Voice Response with Feedback Intervention in Outpatient Treatment of Substance Use Problems in Adolescents and Young Adults: A Randomized Controlled Trial    | Not self-control of UAU                    |  |
| Sundström et al (2016)  | Guided and unguided internet-based treatment for problematic alcohol use - A randomized controlled pilot trial                                                            | Contain web-based components               |  |
| Carrà et al (2016)      | Impact of a Mobile E-Health Intervention on Binge Drinking in Young People: The Digital-Alcohol Risk Alertness Notifying Network for Adolescents and Young Adults Project | No control group                           |  |
| Andersson (2015)        | Smartphone applications can help in treatment for alcoholism                                                                                                              | Not journal paper, but a commentary        |  |
| Gonzalez & Dulin (2015) | Comparison of a smartphone app for alcohol use disorders with an internet-based intervention plus bibliotherapy: A pilot study                                            | Contain web-based components               |  |
| Hasin et al (2014)      | HealthCall for the smartphone: technology enhancement of brief intervention in HIV alcohol dependent patients                                                             | No randomized                              |  |
| Gamito et al (2014)     | Executive functioning in alcoholics following an mhealth cognitive stimulation program: Randomized controlled trial                                                       | did not report any alcohol-related outcome |  |
| Litt et al (2009)       | Individualized assessment and treatment program for alcohol dependence: Results of an initial study to train coping skills                                                | No control group                           |  |
| Helzer et al (2008)     | Using interactive voice response to enhance brief alcohol intervention in primary care settings                                                                           | Not mobile                                 |  |
| Rose et al (2017)       | A Randomized Controlled Trial of Brief Intervention by Interactive Voice Response                                                                                         | Not mobile                                 |  |
| Rose et al (2015)       | Efficacy of automated telephone continuing care following outpatient therapy for alcohol dependence                                                                       | Not mobile                                 |  |
