# Supplementary material for: Mobile Health Interventions for Self-Control of Unhealthy Alcohol Use: Systematic Review
Source: PubMed Central journal article supplement (PMC6371076; doi:10.2196/10899), 2019-01-29
Supplement: mhealth_v7i1e10899_app4.pdf [file mhealth_v7i1e10899_app4.pdf]

## Appendix 4. Quality appraisal of the included studies

| <b>Author(s) (Year)<br/>[Reference]</b>               | <b>Randomization<br/>or sequence<br/>generation</b> | <b>Allocation<br/>concealment</b> | <b>Outcome<br/>data</b> | <b>Attrition</b> |
|-------------------------------------------------------|-----------------------------------------------------|-----------------------------------|-------------------------|------------------|
| Aharonovich et al. (2017)                             | Yes                                                 | Yes                               | Yes                     | Yes              |
| Gajecki et al. (2017)                                 | Yes                                                 | Yes                               | Yes                     | Yes              |
| Muench et al. (2017)                                  | Yes                                                 | Yes                               | Yes                     | Yes              |
| Riordan et al. (2017)                                 | Yes                                                 | Yes                               | Yes                     | No               |
| Bock et al. (2016)                                    | Yes                                                 | Yes                               | Yes                     | Yes              |
| Andersson (2015)                                      | Yes                                                 | Yes                               | Yes                     | Yes              |
| Haug et al. (2015)                                    | Yes                                                 | Yes                               | Yes                     | Yes              |
| Riordan et al. (2015)                                 | Yes                                                 | No                                | Yes                     | Can't tell       |
| Suffoletto et al. (2015)<br>Suffoletto et al. (2014)* | Yes                                                 | Yes                               | Yes                     | No               |
| Bendtsen & Bendtsen (2014)                            | Yes                                                 | Yes                               | Yes                     | No               |
| Brendryen et al. (2014)                               | Yes                                                 | Yes                               | Yes                     | No               |
| Gajecki et al. (2014)                                 | Yes                                                 | Yes                               | Yes                     | No               |
| Gustafson et al. (2014)                               | Yes                                                 | Yes                               | Yes                     | No               |
| Lucht et al. (2014)                                   | Yes                                                 | Yes                               | Yes                     | Yes              |
| Mason et al. (2014)                                   | Yes                                                 | No                                | Can't tell              | Yes              |
| Witkiewitz et al. (2014)                              | Yes                                                 | Yes                               | Yes                     | Yes              |
| Agyapong et al. (2013)<br>Agyapong et al. (2012)*     | Yes                                                 | Yes                               | Yes                     | Yes              |
| Alessi & Petry (2013)                                 | Yes                                                 | Yes                               | Yes                     | Yes              |
| Hasin et al. (2013)                                   | Yes                                                 | Yes                               | Yes                     | Yes              |
