# Supplementary material for: Mobile Health Interventions for Self-Control of Unhealthy Alcohol Use: Systematic Review
Source: PubMed Central journal article supplement (PMC6371076; doi:10.2196/10899), 2019-01-29
Supplement: mhealth_v7i1e10899_app5.pdf [file mhealth_v7i1e10899_app5.pdf]

## Appendix 5. Characteristics of the included studies

| Author(s) (Year)                                      | Country of origin | Sample size | Study arm                                                                                                                                                                                         |
|-------------------------------------------------------|-------------------|-------------|---------------------------------------------------------------------------------------------------------------------------------------------------------------------------------------------------|
| Aharonovich et al. (2017)                             | USA               | 47          | HealthCall-S+MI (IG, n=23)<br>MI-only (CG, n=24)                                                                                                                                                  |
| Gajecki et al. (2017)                                 | Sweden            | 186         | Use TeleCoach Immediately after randomization (IG: n=93)<br>Use TeleCoach after 6 weeks/waitlist (CG: n=93)<br>Assessment-only control group (AG: n=144)                                          |
| Muench et al. (2017)                                  | USA               | 157         | Gain-frame SMS (IG, n=31)<br>Loss-frame SMS (IG, n=31)<br>Statically Tailored SMS (IG, n=32)<br>Tailored Adaptive SMS (IG, n=33)<br>Assessment only SMS (CG, n=30)<br>Non-intervention (CG, n=19) |
| Riordan et al. (2017)                                 | New Zealand       | 386         | EMI+EMA (IG: n=59+135)<br>EMA only (CG: n=58+134)                                                                                                                                                 |
| Bock et al. (2016)                                    | USA               | 60          | Text Message Alcohol Program (IG, n=31)<br>General motivational SMS (CG, n=29)                                                                                                                    |
| Andersson (2015)                                      | Sweden            | 1678        | Single WEB (IG, n=323)<br>Repeated WEB (IG, n=318)<br>Single IVR (IG, n=329)<br>Repeated IVR (IG, n=334)<br>Screening only (CG, n=374)                                                            |
| Haug et al. (2015)                                    | Switzerland       | 50          | Aftercare programme SMS (IG, n=25)<br>Non-intervention (CG, n=25)                                                                                                                                 |
| Riordan et al. (2015)                                 | New Zealand       | 130         | Intervention SMS (IG, n: NR)<br>Assessment only (CG, n: NR)                                                                                                                                       |
| Suffoletto et al. (2015)<br>Suffoletto et al. (2014)* | USA               | 765         | SMS + Feedback (IG, n=384)<br>Assessment only SMS (CG, n=196)<br>Non-intervention (CG, n=185)                                                                                                     |
| Bendtsen & Bendtsen (2014)                            | Sweden            | 454         | SMS (IG, n=229)<br>Email (CG, n=193)                                                                                                                                                              |
| Brendryen et al. (2014)                               | Norway            | 244         | Brief + Intensive SMS (IG, n=125)<br>Brief + e-Booklet with non-behavior change of drinking (CG, n=119)                                                                                           |
| Gajecki et al. (2014)                                 | Sweden            | 1932        | PartyPlanner (IG, n=639)<br>Promillekoll (IG, n=643)<br>Non-intervention (CG, n=647)                                                                                                              |
| Gustafson et al. (2014)                               | USA               | 349         | A-CHESS (IG, n=170)<br>Non-intervention (CG, n=179)                                                                                                                                               |

|                                                                                                                                                                                                                          |         |     |                                                                                           |
|--------------------------------------------------------------------------------------------------------------------------------------------------------------------------------------------------------------------------|---------|-----|-------------------------------------------------------------------------------------------|
| Lucht et al. (2014)                                                                                                                                                                                                      | Germany | 80  | SMS (IG: n=42)<br>TAU (CG: n=38)                                                          |
| Mason et al. (2014)                                                                                                                                                                                                      | USA     | 18  | MI + SMS (IG, n=8)<br>MI only (CG, n=10)                                                  |
| Witkiewitz et al. (2014)                                                                                                                                                                                                 | USA     | 94  | BASICS-Mobile (IG, n=32)<br>Mobile monitoring (CG, n=33)<br>Minimal assessment (CG, n=29) |
| Agyapong et al. (2013)<br>Agyapong et al. (2012)*                                                                                                                                                                        | Ireland | 54  | Supportive SMS (IG, n=26)<br>Thanks SMS (CG, n=28)                                        |
| Alessi & Petry (2013)                                                                                                                                                                                                    | USA     | 30  | Contingency management SMS (IG, n=15)<br>SMS (CG, n=15)                                   |
| Hasin et al. (2013)                                                                                                                                                                                                      | USA     | 258 | MI+HealthCall (IG, n=88)<br>MI only (CG, n=82)<br>Advice/Education (CG, n=88)             |
| <p>AUD: alcohol use disorder<br/> CG: control group<br/> IG: intervention group<br/> IVR: interactive voice response<br/> MI: motivational interviewing<br/> SMS: short message service<br/> TAU: treatment as usual</p> |         |     |                                                                                           |
