# Supplementary material for: Mobile Health Interventions for Self-Control of Unhealthy Alcohol Use: Systematic Review
Source: PubMed Central journal article supplement (PMC6371076; doi:10.2196/10899), 2019-01-29
Supplement: mhealth_v7i1e10899_app6.pdf [file mhealth_v7i1e10899_app6.pdf]

## Appendix 6. Summary of included studies

| Author(s)<br>(Year)<br>[Reference] | Context<br>(patient<br>characteristics; study<br>setting; non-mobile co-<br>intervention)                                                                                                                           | Theoretical base                                                                          | Content                                                                                                                                                                                                                                                                                                                                                                                                                                                                                                                                                                                                              | Delivery mode         | Implementation procedure<br>(length of intervention<br>period; frequency; timing;<br>baseline and follow-up<br>assessment; other tricks)                                                                                                                                                                                                                                                                     | Health outcome                                                                                                                                                                                                                                                                                  |
|------------------------------------|---------------------------------------------------------------------------------------------------------------------------------------------------------------------------------------------------------------------|-------------------------------------------------------------------------------------------|----------------------------------------------------------------------------------------------------------------------------------------------------------------------------------------------------------------------------------------------------------------------------------------------------------------------------------------------------------------------------------------------------------------------------------------------------------------------------------------------------------------------------------------------------------------------------------------------------------------------|-----------------------|--------------------------------------------------------------------------------------------------------------------------------------------------------------------------------------------------------------------------------------------------------------------------------------------------------------------------------------------------------------------------------------------------------------|-------------------------------------------------------------------------------------------------------------------------------------------------------------------------------------------------------------------------------------------------------------------------------------------------|
| Aharonovich<br>et al. (2017)       | AUD patients with HIV<br>and use of drug, mean<br>age: 51 years;<br>Community-based<br>setting;<br>MI                                                                                                               | NR (But the<br>author claimed<br>that the design of<br>HealthCall app is<br>theory-based) | (1) general queries about quantity of<br>alcohol use, level of desire and<br>commitment<br>(2) personalized alcohol use graph (3)<br>reinforcement of alcohol abstinence<br>(4) daily “tip” video in which a<br>counselor introduced skills to cut down<br>alcohol use<br>(5) referrals to call counsellor<br>(6) reminders about sticking to the goal<br>(7) a reminder if not use the App more<br>than 24 hours                                                                                                                                                                                                    | App<br>(HealthCall-S) | 60 days;<br>Daily use (3mins/day);<br>Morning, afternoon or evening<br>decided by the participants but<br>need to be consistent every<br>day;<br>Baseline assessment, 30-days<br>assessment, 60-day<br>assessment;<br>Provision of the study<br>smartphone with the data plan,<br>provision of \$40 worth of gift<br>card per assessment visit                                                               | No significant outcome for all<br>following measurements: reduced<br>DD, reduced DDD                                                                                                                                                                                                            |
| Gajecki et al.<br>(2017)           | AUD students, mean<br>age: 25 years;<br>University setting;<br>NR                                                                                                                                                   | NR                                                                                        | (1) queries about alcohol use<br>(2) a guideline for UAU<br>(3) prevention skills for dealing with<br>relapse, including risk simulation<br>analysis, alcohol refusal, relax,<br>positive thinking exercises and urge<br>surfing training                                                                                                                                                                                                                                                                                                                                                                            | App<br>(TeleCoachTM)  | 12 weeks;<br>Once weekly;<br>NR;<br>Baseline assessment, 6-week<br>assessment, 12-week<br>assessment;<br>NR                                                                                                                                                                                                                                                                                                  | SD (6-week assessment): IG<CG<br>( $P=0.037$ ), no longer significant<br>at 12-week assessment<br>Frequency (6-week and 12-week<br>assessments): IG<CG ( $P=0.041$ ,<br>$P=0.034$ )<br>No significant outcome for all<br>following measurements: binge<br>occasions, average eBAC, peak<br>eBAC |
| Muench et al.<br>(2017)            | Risky drinking adults,<br>mean age: 43 years;<br>Community-based<br>setting;<br>Participants learned<br>NIAAA guidelines for<br>safe alcohol use and a<br>document regarding<br>how to respond mobile<br>assessment | Social learning<br>theory, health<br>belief model                                         | (1) queries about alcohol use<br>(2a) loss-frame IG (LF): negative<br>consequences of problem drinking<br>(2b) gain-frame IG (GF): benefits of<br>reducing drinking to safe guidelines<br>(2c) statically tailored content IG (ST):<br>tailored messages based on individual<br>responses to baseline assessment<br>(2d) tailored adaptive IG (TA)<br>(2d1) individual tailored SMSs<br>according to goal achievement<br>(2d2) 2 SMSs with participant’s name<br>at the heaviest typical drinking times<br>(2d3) a supportive message to response<br>one of the automated system keywords<br>sent by the participant | SMS                   | 12 weeks;<br>Once weekly (4 SMSs) for<br>content (1) and each SMS<br>would be resent 3 more times<br>in next 2 hours if no response<br>within 1.5 hour for all IGs<br>Once daily for content (2a),<br>(2b), and (2c) to LF, GF and<br>ST&TA respectively at 6:00<br>pm<br>Once weekly for content (2d1)<br>and (2d2);<br>Immediately for content (2d3);<br>Baseline assessment, 12-week<br>assessment;<br>NR | Reduction of weekly SD:<br>LF>MA ( $P=0.03$ ), ST>MA<br>( $P=0.01$ ), TA>MA ( $P=0.00$ )<br>Reduction of weekly HDD:<br>LF>MA ( $P=0.05$ ), ST>MA<br>( $P=0.01$ ), TA>MA ( $P=0.00$ )<br>Increase of weekly abstinent<br>days: GF>MA ( $P=0.03$ ),<br>ST>MA ( $P=0.04$ ), TA>MA<br>( $P=0.02$ ) |
| Riordan et al.<br>(2017)           | Risky drinking students,<br>mean age: 18.5 years;                                                                                                                                                                   | NR                                                                                        | Potential social consequence of UAU<br>with colloquial tone                                                                                                                                                                                                                                                                                                                                                                                                                                                                                                                                                          | SMS                   | 1 week (orientation week)<br>4 times week;                                                                                                                                                                                                                                                                                                                                                                   | (1) In College 1:<br>SD during orientation week:                                                                                                                                                                                                                                                |

|                       |                                                                           |                                                    |                                                                                                                                                                                                                                                |     |                                                                                                                                                                                                                                                                 |                                                                                                                                                                                                                                                                     |
|-----------------------|---------------------------------------------------------------------------|----------------------------------------------------|------------------------------------------------------------------------------------------------------------------------------------------------------------------------------------------------------------------------------------------------|-----|-----------------------------------------------------------------------------------------------------------------------------------------------------------------------------------------------------------------------------------------------------------------|---------------------------------------------------------------------------------------------------------------------------------------------------------------------------------------------------------------------------------------------------------------------|
|                       | University setting;<br>NR                                                 |                                                    |                                                                                                                                                                                                                                                |     | Tuesday, Thursday, Friday and Saturday night at 19:00 and 21:00;<br>Baseline assessment, 1-week assessment, 1-semester assessment;<br>Provision of opportunity to win a mobile phone and prize of cash                                                          | IG<CG ( $P=0.18$ ), SD during the 1 <sup>st</sup> semester: IG<CG ( $P=0.39$ )<br>(2) In college 2: There are no significant differences in terms of alcohol use, but male students consumed significantly more alcohol than the female students ( $P<0.001$ ).     |
| Bock et al. (2016)    | Risky drinking students, mean age: 22 years;<br>College setting;<br>NR    | NR                                                 | (1) Alcohol facts<br>(2) strategies to limit alcohol use and alcohol-related risks<br>(3) motivation<br>(4) a supportive message to response one of the automated system keywords sent by the participant                                      | SMS | 6 weeks;<br>Once weekly (6 SMSs) for content (1)-(3), immediately for content (6);<br>Thursday and Sunday evening (1 SMS for each day), Friday and Saturday evening (2 SMSs for each day);<br>Baseline assessment; 6-week assessment; 12-week assessment;<br>NR | No significant outcome for all following measurements:<br>Drinking days per month<br>HDD per month<br>DDD<br>eBAC<br>Drinking days per past 2 weeks<br>Negative consequence<br>Strategies to limit drinking<br>Brief situational confidence                         |
| Andersson (2015)      | Risky drinking students, mean age: 23 years;<br>University setting;<br>NR | NR                                                 | (1) personalized feedback for assessment results<br>(2) information on risk of negative consequences<br>(3) information on SD<br>(4) personalized recommendations for alcohol use<br>(5) information for increasing tolerance and goal-setting | IVR | 1 week for single IG and 4 weeks for repeated IG;<br>Once daily;<br>NR;<br>Baseline assessment, 5-week assessment (4 weeks after intervention for single IG or 1 week after the intervention for repeat IG);<br>NR                                              | Reduction of peak eBAC: IG (total)>CG ( $P=0.023$ ), IG (repeated)>CG ( $P=0.046$ )<br>Reduction of AUDIT score: IG (total)>CG ( $P=0.000$ ), IG (single)>CG ( $P=0.001$ ), IG (repeated)>CG ( $P=0.001$ )<br>DDD, frequency of drinking, mean BAC: not significant |
| Haug et al. (2015)    | AUD patients, mean age: 47 years;<br>Clinical setting;<br>NR              | Theory of planned behaviour                        | (1) personalized queries for monitoring drinking goals<br>(2) personalized motivation of maintaining drinking goal according to their replies<br>(3) a reminder to the counsellor if no SMS reply over 2 days                                  | SMS | 6 months;<br>Once weekly (weeks 1-8) and bi-weekly (weeks 10-26) for content (1),<br>Immediately for content (2);<br>Monday at 18:00;<br>Baseline assessment; 6-month assessment<br>Phone calls from the therapist for support, empathy and further help        | No significant outcome for AUDIT-C score                                                                                                                                                                                                                            |
| Riordan et al. (2015) | Risky drinking students, mean age: 22 years;<br>University setting;<br>NR | Social cognition models<br>Social cognitive theory | (1) social consequence of alcohol use<br>(2) health consequence of alcohol use<br>(3) queries about alcohol use                                                                                                                                | SMS | 1 week (orientation week);<br>Once daily;                                                                                                                                                                                                                       | Reduction of SD during Orientation Week (women only): IG<CG ( $P<0.05$ )<br>Reduction of SD during the                                                                                                                                                              |

|                                                       |                                                                                              |                                                                                                                                  |                                                                                                                                                                                                                                                                                                                                                                                                                                                                                           |     |                                                                                                                                                                                                                                                                                           |                                                                                                                                                                                                                                                                                                                                                                        |
|-------------------------------------------------------|----------------------------------------------------------------------------------------------|----------------------------------------------------------------------------------------------------------------------------------|-------------------------------------------------------------------------------------------------------------------------------------------------------------------------------------------------------------------------------------------------------------------------------------------------------------------------------------------------------------------------------------------------------------------------------------------------------------------------------------------|-----|-------------------------------------------------------------------------------------------------------------------------------------------------------------------------------------------------------------------------------------------------------------------------------------------|------------------------------------------------------------------------------------------------------------------------------------------------------------------------------------------------------------------------------------------------------------------------------------------------------------------------------------------------------------------------|
|                                                       |                                                                                              | Theory of planned behavior<br>Self-determination theory<br>Model of action phases                                                |                                                                                                                                                                                                                                                                                                                                                                                                                                                                                           |     | Tuesday, Thursday and Saturday night (3 SMSs) at 19:30 for content (1)<br>Monday, Wednesday and Friday night (3 SMSs) at 19:30 for content (2)<br>Thursday, Friday, Saturday and Sunday (4 SMSs) for content (3);<br>Baseline assessment; 1-week assessment, 1-semester assessment;<br>NR | first semester (women only):<br>IG<CG ( $P<0.05$ )                                                                                                                                                                                                                                                                                                                     |
| Suffoletto et al. (2015)<br>Suffoletto et al. (2014)* | Risky drinking emergency department patients, mean age: 22 years;<br>Hospital setting;<br>MI | Health belief model, information motivation behaviour model, theory of reasoned action, theory of planned behavior               | (1) queries for reporting weekend drinking and binge plans<br>(2) decision not to set a low-risk goal<br>(2a) If “Yes”, queries for reporting low-risk goal setting and feedback to promote reflection on drinking plan<br>(2b) If “No”, feedback to strengthen low-risk drinking plan/goal<br>(3) queries for reporting alcohol use<br>(3a) feedback to support low-risk drinking behavior for adherence<br>(3b) feedback to promote reflection on alcohol consumption for non-adherence | SMS | 12 weeks;<br>Twice weekly;<br>Thursday for contents (1) and (2), Sunday for contents (3);<br>Baseline assessment, 3-month assessment, 6-month assessment, 9-month assessment;<br>NR                                                                                                       | HDD (at all assessments): IG<CG (significant intervention by time interaction)<br>DDD (at all assessments): IG<CG (significant intervention by time interaction)<br>Binge drinking prevalence (at all assessment): IG<CG (significant intervention by time interaction)<br>Alcohol-related injury prevalence (at 9-month assessment): IG<CG, not significant at others |
| Bendtsen & Bendtsen (2014)                            | Risky drinking students, mean age: 24 years;<br>University setting;<br>NR                    | Social cognition models, social cognitive theory, theory of planned behaviour, self-determination theory, model of action phases | (1) food for thought queries<br>(2) task<br>(3) challenges<br>(4) reflective                                                                                                                                                                                                                                                                                                                                                                                                              | SMS | 4 weeks;<br>4 times weekly (4 SMSs);<br>Wednesday for content (1), Friday for content (2), Saturday for content (3) and Sunday for content (4);<br>Baseline assessment, 4-week assessment;                                                                                                | No significant outcome for all following measurements:<br>Perceived drinking compared with peers<br>Motivation to change                                                                                                                                                                                                                                               |
| Brendryen et al. (2014)                               | Risky drinking adults, mean age: 39 years;<br>Community-based setting;<br>NR                 | NR                                                                                                                               | (1) personalized comparison of the reported drinking habits to the recommended gender-matched low-risk drinking guidelines and national gender-matched averages<br>(2) 62 online sessions include four aspects: goal-setting and daily alcohol use track record, relapse prevention, emotion regulation and alcohol education.                                                                                                                                                            | SMS | 6 months;<br>1 session daily for the first 56 sessions, 1 session weekly for sessions 57-60, 1 session monthly for sessions 61 and 62;<br>Available on demand;<br>Baseline assessment, 2-month assessment, 6-month assessment;                                                            | Weekly alcohol consumption:<br>IG<CG ( $P=0.049$ )<br>FAST score: not significant                                                                                                                                                                                                                                                                                      |

|                          |                                                                                      |                                |                                                                                                                                                                                                                                                                                                                                          |                     |                                                                                                                                                                                         |                                                                                                                                                                                                                                                                                     |
|--------------------------|--------------------------------------------------------------------------------------|--------------------------------|------------------------------------------------------------------------------------------------------------------------------------------------------------------------------------------------------------------------------------------------------------------------------------------------------------------------------------------|---------------------|-----------------------------------------------------------------------------------------------------------------------------------------------------------------------------------------|-------------------------------------------------------------------------------------------------------------------------------------------------------------------------------------------------------------------------------------------------------------------------------------|
|                          |                                                                                      |                                |                                                                                                                                                                                                                                                                                                                                          |                     | NR                                                                                                                                                                                      |                                                                                                                                                                                                                                                                                     |
| Gajecki et al. (2014)    | Risky drinking and AUD students, mean age: 25 years; University setting<br>NR        | Theory of planned behavior     | (1) register for alcohol use<br>(2) eBAC result<br>(3) notification<br>(4) strategies to control alcohol use if a participant's alcohol use could lead to BAC>0.06%                                                                                                                                                                      | App (Promillekoll)  | 7 weeks;<br>Real-time use;<br>Baseline assessment, 7-weeks assessment;<br>NR                                                                                                            | SD per week, binge occasions, eBAC per week, peak eBAC per month: not significant<br>Drinking frequency (time-by-group interaction): IG>CG ( $P=0.001$ )<br>Drinking frequency (male): IG>CG ( $P=0.001$ )                                                                          |
|                          |                                                                                      | Theory of planned behavior     | (1) a simulation of a planned drinking occasion for setting personal eBAC<br>(2) register for alcohol use<br>(3) eBAC result<br>(4) comparison of planned eBAC with actual eBAC                                                                                                                                                          | App (PartyPlanner)  |                                                                                                                                                                                         |                                                                                                                                                                                                                                                                                     |
| Gustafson et al. (2014)  | AUD patients, mean age: 38 years; Nonprofit treatment organization setting<br>NR     | Self-determination theory      | (1) anonymous discussion<br>(2) question and answer<br>(3) instant library<br>(4) experience and knowledge sharing<br>(5) web-links<br>(6) distress easing<br>(7) warning when near high-risk alcohol place based on GPS tech<br>(8) brief survey to obtain patient data on negative affect, lifestyle balance, and recent substance use | App (A-CHESS)       | 8 months;<br>Real-time use, once weekly for content (8);<br>Baseline assessment, 4-month assessment, 8-month assessment, 12-month assessment;<br>NR                                     | HDD (4-month and 12-month assessments): IG>CG ( $P=0.002$ , $P=0.003$ ), not significant at 8-month assessment<br>Prevalence and odds of abstinence (8-month and 12-month assessments, overall): IG>CG ( $P=0.004$ , $P=0.002$ , $P=0.003$ ), not significant at 4-month assessment |
| Lucht et al. (2014)      | AUD patients, mean age: 46 years<br>Hospital setting<br>NR                           | NR                             | (1) queries about alcohol use<br>(2) referrals for further help<br>(3) general automatic supportive feedback<br>(4) a reminder to the therapist if no SMS reply more than 24 hours                                                                                                                                                       | SMS                 | 8 weeks;<br>Twice weekly;<br>Monday and Thursday;<br>Baseline assessment, 30-day assessment, 60-day assessment;<br>Phone calls from the therapist for support, empathy and further help | DD: No significant outcome<br>DDD: No significant outcome, but small effect in favor of IG<br>HDD: No significant outcome                                                                                                                                                           |
| Mason et al. (2014)      | Risky drinking students, mean age: 19 years<br>College setting;<br>MI                | Social network counselling     | (1) queries about drinking facts<br>(2) social norms<br>(3) social risk<br>(4) protective behavioral "boosts" if requested                                                                                                                                                                                                               | SMS                 | 4 consecutive days;<br>4-6 SMSs daily;<br>NR;<br>Baseline assessment, 1-month assessment;<br>NR                                                                                         | Readiness to change alcohol use: IG↑, CG↓ ( $P<0.01$ )<br>AUDIT, SD, Alcohol expectations, Importance of changing, Confidence in ability to change, intentions to reduce alcohol use, taking steps to reduce alcohol use: not significant                                           |
| Witkiewitz et al. (2014) | Risky drinking students with smoking, mean age: 20.5 years<br>College setting;<br>MI | Cognitive-behavioral treatment | (1) normative feedback<br>(2) general or health information on alcohol use<br>(3) protective behavioral strategies for alcohol use<br>(4) alternative activities to alcohol use<br>(5) urge-surfing                                                                                                                                      | App (BASICS-Mobile) | 14 days;<br>Real-time use;<br>NR;<br>Baseline assessment, 14-day assessment, 1.5-month assessment;<br>NR                                                                                | No significant outcome for all following measurements:<br>DDD<br>HDD<br>Young Adult Alcohol Problem Screening Test                                                                                                                                                                  |

|                                                   |                                                                                                       |                        |                                                                                                                                                                                                                                                                              |     |                                                                                                                                                                                                                               |                                                                                                                                                                                                                                                                                                                                                                                              |
|---------------------------------------------------|-------------------------------------------------------------------------------------------------------|------------------------|------------------------------------------------------------------------------------------------------------------------------------------------------------------------------------------------------------------------------------------------------------------------------|-----|-------------------------------------------------------------------------------------------------------------------------------------------------------------------------------------------------------------------------------|----------------------------------------------------------------------------------------------------------------------------------------------------------------------------------------------------------------------------------------------------------------------------------------------------------------------------------------------------------------------------------------------|
|                                                   |                                                                                                       |                        | (6) decisional balance for alcohol use                                                                                                                                                                                                                                       |     |                                                                                                                                                                                                                               |                                                                                                                                                                                                                                                                                                                                                                                              |
| Agyapong et al. (2013)<br>Agyapong et al. (2012)* | AUD patients with unipolar depression, mean age: 48 years; Hospital setting<br>NR                     | NR                     | (1) promoting alcohol abstinence<br>(2) dealing with cravings<br>(3) promoting medication adherence<br>(4) providing general support                                                                                                                                         | SMS | 3 months;<br>Twice daily (180 SMSs randomly sent);<br>10:00 and 19:00;<br>Baseline assessment, 3-month assessment, 6-month assessment (published in 2013);<br>NR                                                              | Cumulative abstinence duration (3-month and 6-month assessment): IG>CG (not significant);<br>Alcohol Abstinence Self Efficacy Scale (3-month assessment): IG>CG (P=0.02), no longer significance at 6-month assessment;<br>Days to first drink (6-month assessment): IG>CG (P=0.01), not significant at 3-month assessment;<br>DDD (3-month and 6-month assessment): IG<CG (not significant) |
| Alessi & Petry (2013)                             | Risky drinking adults, mean age: 34 years; Community-based setting;<br>NR                             | Contingency management | (1) Reminder about BrAC video submission<br>(2) Reminder about possible compensation for valid on-time video                                                                                                                                                                 | SMS | 4 weeks;<br>1-3 times daily;<br>From 8 am to 11 pm (concentrated in evenings from 6 pm to 11 pm and weekends);<br>Baseline assessment, 4-weeks assessment;<br>Monetary incentives                                             | Percentage of n-BrAC: IG>CG (P=0.00)<br>Longest abstinent days: IG>CG (P=0.00)<br>Reduction of DD: IG>CG (P=0.00)<br>Reduction of Alcohol Addiction Severity Index: IG>CG (P=0.01)<br>Reduction of overall Drinker Inventory of Consequences: IG>CG (P=0.00)<br>Reduction of DDD: not significant                                                                                            |
| Hasin et al. (2013)                               | HIV patients with risky drinking and AUD, mean age: 46 years<br>Clinical settings;<br>MI and training | NR                     | (1) queries about alcohol consumption<br>(2) queries about reasons for drinking/abstinence<br>(3) queries about mood<br>(4) queries about medication adherence<br>(5) queries about wellbeing<br>(6) reminder about continuous participation if missed two consecutive calls | IVR | 60 days (first session for 30 days repeated second session for 30 days);<br>1-3 minutes daily;<br>Baseline assessment, 30-day assessment, 60-day assessment, 90-day assessment, 180-day assessment, 365-day assessment;<br>NR | Reduction of DD (60-day assessment): IG>CG (P<0.01);<br>IG>CG (P=0.03), no longer significance after 60-days                                                                                                                                                                                                                                                                                 |

AUD: alcohol use disorder  
CG: control group  
DD: drinking day  
DDD: drink per drinking day  
HDD: heavy drinking day  
IG: intervention group  
IVR: interactive voice response  
MI: motivational interviewing  
NR: not reported  
SMS: short message service
